# Supplementary material for: Sulphated yttria–zirconia as a regioselective catalyst system for the alcoholysis of epoxides
Source: Royal Society of Chemistry journal article supplement (doi:10.1039/c2cy20116j), 2012-01-01
Supplement: c2cy20116j.pdf [file c2cy20116j.pdf]

## **Supporting Information**

### **Sulphated Yttria-Zirconia as a regioselective catalyst system for the alcoholysis of epoxides**

**Sandeep S. Kahandal, Sandip R. Kale, Shamrao T. Disale and Radha V. Jayaram\***

Institute of Chemical Technology,  
Department of Chemistry, N.M.Parekh Marg, Matunga Mumbai-400019  
(India) Fax: +91 22 2269 2102, Tel.: + 91 22 3361 2607  
E-mail: rv.jayaram@ictmumbai.edu.in

## Preparation of Catalysts:

The catalyst was prepared by mixing aqueous solutions of yttrium nitrate and zirconyl nitrate in the appropriate mole ratio to which aqueous ammonia (28%) was added under vigorous stirring until a pH of the solution reached to 8.5 and precipitate was formed. Washing with deionized water, drying at 110° C for 24 h. further treating with sulfuric acid (4 M), drying at 120° C and subsequent calcinations of 500° C for 3 h. resulted in a highly acidic material.

## Thermogravimetric analysis:

The thermal stability of the prepared sample was investigated by a TGA method. The thermogram obtained for the sulphated yttria-zirconia is presented in Fig. 5. Thermogravimetric analysis (TGA) was carried out at 10° C min<sup>-1</sup>. The TGA profile was characterized by weight loss till 223° C. The weight loss occurs at 67° C to 223° C (9.15 % weight loss). Further upto 600° C catalyst show good thermal stability and no remarkable weight loss were observed.

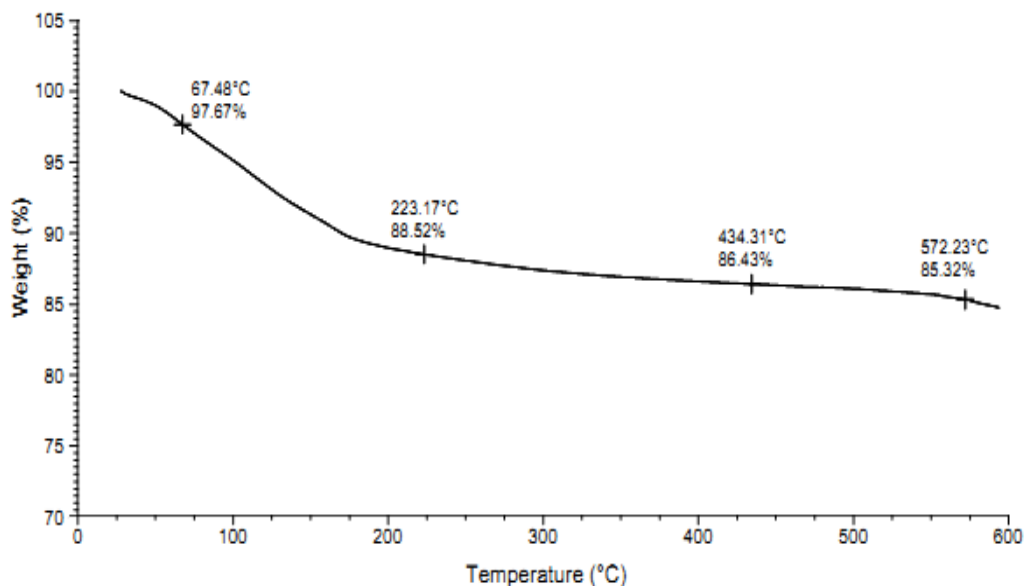

**Figure 1.** Thermogravimetric analysis curve for  $\text{SO}_4^{2-}/\text{Y}_{0.16}\text{Zr}_{0.84}\text{O}_2$  catalyst.

## Potentiometric titrations for acidity measurement:

Potentiometric titrations were carried out by using Equip-tronic model (EQ-614A) instruments. Catalysts were dried at 120° C for 2 h., prior to use for titrations. The 0.1 g of catalysts amount dispersed in acetonitrile as non-aqueous solvent and stirred for 1 h. Further the catalyst titrated with 0.05 M solution of n-butylamine in acetonitrile. The initial electrode potential ( $E_i$ ) indicates the maximum acid strength of the sites, and the end point value in mmol/g of n-butylamine, indicates the total number of acid sites.

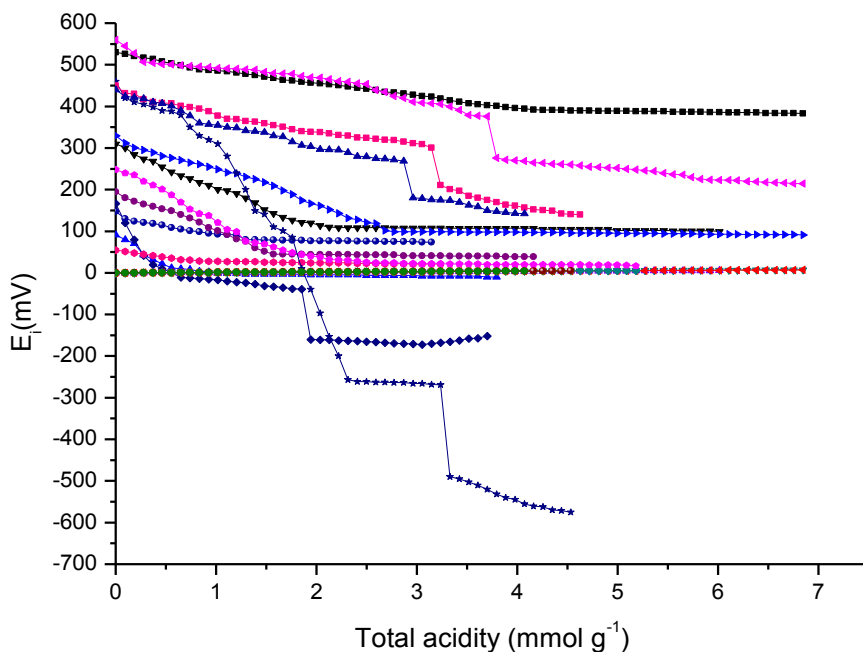

**Figure 2.** Potentiometric titration curves for all the mixed oxides and surface modified mixed oxides used in the study of epoxide ring opening reaction (Please See table no. 1).

### X-Ray diffraction analysis:

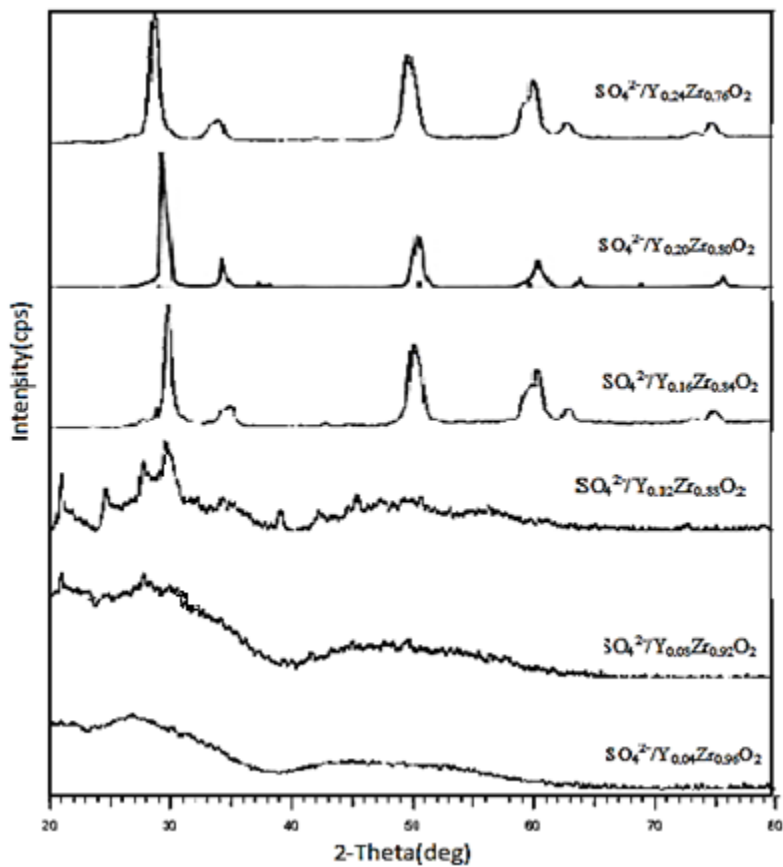

Figure 3 X-ray diffraction analysis of different compositions of sulphated yttria-zirconia catalysts.

## FT-IR analysis

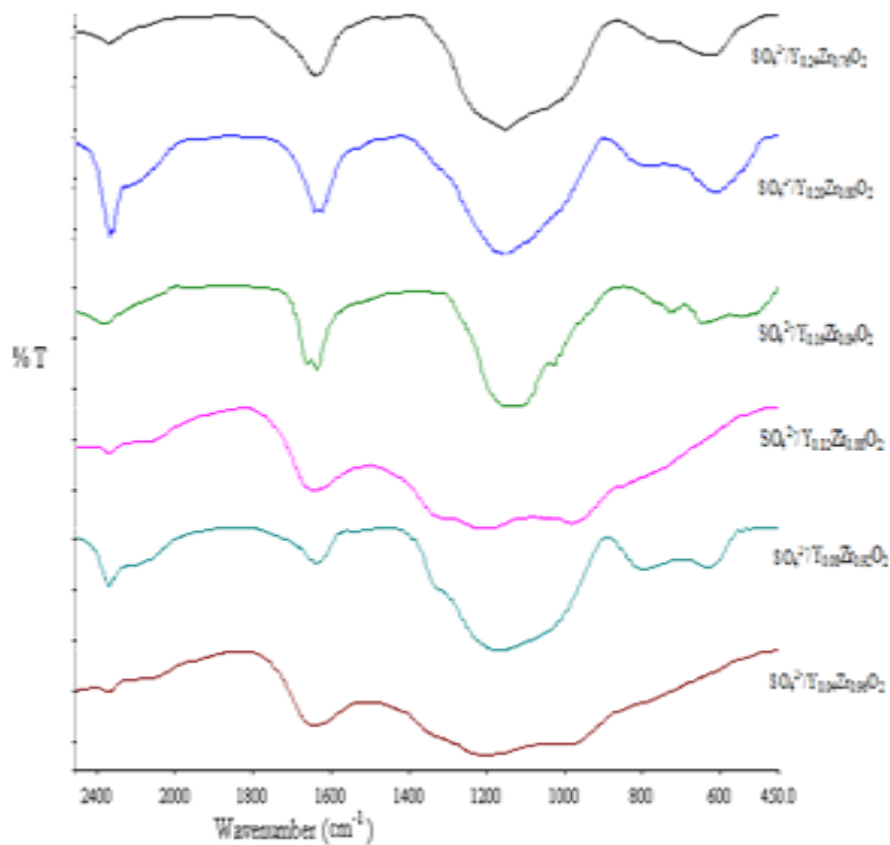

Figure 4 FT-IR analysis of different compositions of sulphated yttria-zirconia catalysts.
